# Supplementary material for: Controlled packing and single-droplet resolution of 3D-printed functional synthetic tissues
Source: PubMed Central journal article supplement (PMC7192927; doi:10.1038/s41467-020-15953-y), 2020-04-30
Supplement: 41467_2020_15953_MOESM2_ESM.pdf [file 41467_2020_15953_MOESM2_ESM.pdf]

## Description of Additional Supplementary Files

File name: Supplementary Movie 1

Description: 3D reconstruction of a droplet replica cluster at the centre of a network. 360° rotation and horizontal cross-sections of the 3D reconstruction of a fluorescent droplet replica cluster composed of 14 droplets arranged in a hcp lattice (relative to Fig. 5 and Supplementary Fig. 9a-k).

File name: Supplementary Movie 2

Description: 3D reconstruction of a droplet replica cluster at the top of a network. 360° rotation and horizontal cross-sections of the 3D reconstruction of a fluorescent droplet replica cluster composed of 6 droplets on the top of a network (Supplementary Fig. 5l-p).
